## **Long title**

# **DETERMINANTS OF HUMAN IMMUNODEFICIENCY VIRUS (HIV) TRANSMISSION AMONG CHILDREN BORN TO HIV-INFECTED MOTHERS ON PMTCT PROGRAM IN KILIFI COUNTY: A CASE CONTROL STUDY**

## **Short title**

# **MOTHER TO CHILD HUMAN IMMUNODEFICIENCY VIRUS (HIV) TRANSMISSION IN RURAL COASTAL KENYA**

## **Authors**

**Rukiya Mohammed Koriow<sup>1</sup>, Julius Otieno Oyugi<sup>2,3</sup>, Christine Muasya<sup>1,2</sup>, Rodgers Onsomu Moindi<sup>4</sup>**

<sup>1</sup> University of Nairobi Institute of Tropical and Infectious Diseases, Nairobi, Kenya. <sup>2</sup> Department of Medical Microbiology, College of Health Sciences, University of Nairobi, Director University of Nairobi Tropical and Infectious Diseases (UNITID) Nairobi, Kenya. <sup>3</sup> University of Nairobi, Department of Clinical Medicine and Therapeutics Nairobi, Kenya. <sup>4</sup> Research unit, Department of Health, County Government of Kilifi.

## **\*Corresponding author**

Rukiya Mohammed Koriow; [rmkoriow@gmail.com](mailto:rmkoriow@gmail.com)

## **Authors' contributions**

Rukiya Mohammed and Christine Muasya: conceptualization of the study, wrote the introduction, results; Rodgers Onsomu, Rukiya Mohammed, Julius Oyugi and Christine Muasya: data collection, discussion of results and wrote the conclusion. Rodgers onsomu & Rukiya Mohamed ; manuscript preparation.

All the authors read and agreed to the final manuscript.

## Abstract

**Background:** Elimination and prevention of mother to child human immunodeficiency virus (HIV) transmission remains a global public health concern. Identification of significant risk factors of mother to child transmission is essential in reducing the burden of pediatric HIV in terms of cost of treatment, morbidity and mortality. Only a few studies have been done to demonstrate the importance of Prevention of Mother to Child Transmission (PMTCT) cascade, including the indicators and how missing one of the crucial steps of the cascade could increase the risk of infant HIV transmission. This study seeks to determine maternal risk factors related to HIV transmission among children born to HIV-infected mothers enrolled in PMTCT program in Kilifi County between July 2018 and June 2019.

**Methods:** This was a retrospective unmatched case control study. Systematic random sampling was used to select medical records of 183 exposed infants (61 cases and 122 controls). A structured tool was used to collect data. Proportions and frequency distribution was done in univariate analysis and in bivariate analysis, chi-square and logistic regression (odds ratio) was used to determine any association and strength of association between categorical variables.

**Results:** Receiving maternal HAART in ANC was established as the major determinant of a favorable HEI outcome in this study. Infants whose mothers had received maternal HAART in ANC were 52.55 (14.89 - 185.48) times more likely to be HIV negative compared to those whose mothers did not receive maternal HAART in ANC. Disclosure of HIV status by the mother at ANC was 3.18 (1.28 - 7.90) times more likely to determine a favorable outcome of the HEI compared to non-disclosure. When adjusted for other factors, it was 6.27 (1.20 - 20.05) times more likely to determine a favorable outcome.

**Conclusion:** The study established the importance of PMTCT service delivery in reduction of vertical transmission of HIV. Women who defaulted on the PMTCT cascade services had higher odds of having a HIV positive infant compared to women who accessed all the PMTCT services at the recommended

time.

**Keywords: Kilifi, HIV positive mothers, PMTCT, ANC, Infant HIV Status**

## 1 **Introduction**

## 2 **Background**

3 Among all age groups, Human Immunodeficiency Virus/Acquired Immune Deficiency Syndrome  
4 (HIV/AIDS) is a lifelong disease with significant morbidity and mortality. Globally, over 38  
5 million people in 2018 were living with HIV/AIDS, with two-thirds of this population and 2.1  
6 million children below 15 years residing in Sub-Saharan Africa (1). Approximately 75 million  
7 people worldwide have become infected with 32 million people having been reported to die due  
8 to AIDS related illnesses since the beginning of the epidemic. Out of these, 770,000 died in 2018.  
9 However, the number of deaths has significantly reduced since 2004 from the peak of 1.7 million  
10 to 1.4 million reported in 2010 (2). New HIV infections among children less than 15 years old  
11 have globally reduced (47%) from 280,000 in 2010 to 160,000 in 2018, which reflects a 42.9%  
12 reduction (3); (4). Approximately 1% of pregnant women worldwide are HIV infected. In 2015,  
13 1.4 million women of reproductive age living with HIV became pregnant and majority were from  
14 sub-Saharan Africa (5). HIV transmission from an infected mother to her child i.e. vertical  
15 transmission may occur during pregnancy, childbirth or while breastfeeding (6). More than 90%  
16 of the mother to child HIV transmission cases are due to vertical transmission (7). This  
17 transmission can entirely be eliminated. However, this has proved to be a challenge, especially in  
18 some of the 22 priority countries listed by the Global Plan to accelerate efforts in prevention of  
19 transmission (PMTCT) of HIV and syphilis among the newborns from the mother (8)(9). In 2015,  
20 six African countries (Botswana, Mozambique, Namibia, South Africa, Swaziland and Uganda)  
21 listed among the priority countries met the 90% target of reducing mother to child transmission.  
22 Cuba, in mid-2015, was the first country to eliminate MTCT. Similar achievements were noted in  
23 the Asia and Pacific region of Thailand in 2016, with Belarus and Armenia reporting less than 5%

24 transmission rate (10). Kenya is among the sub-Saharan Africa countries most affected by  
25 HIV/AIDS pandemic, with at least 2 million adults living with HIV/AIDS. In 2017, it was reported  
26 that there were 110,000 children living with HIV and 8,000 new infections, with a reduction from  
27 25,000 to 13,000 in 2005 and 2010 respectively. In addition, 54,000 HIV positive mothers were  
28 on PMTCT program and 76% had access to antiretroviral treatment (ART), which was  
29 significantly higher compared to 2010 (56%) (5). Much has been done in elimination of mother to  
30 child transmission (e-MTCT) reducing new infections and increasing access to ART among  
31 pregnant women. This is due to adoption and implementation of United Nations four-pronged  
32 strategy for PMTCT (4); (12). Kenya, which is among the 22 priority countries listed, has made  
33 tremendous efforts, which have seen the mother to child transmission rate of HIV infection reduce  
34 from 16% in 2013 to 8.3% in 2015 (13). However, this success was short-lived as the MTCT rate  
35 increased to 11.5% by 2017 and up to 12.4% by 2018 (12). Kenya adopted the Global Plan and  
36 formulated the Kenya Framework for EMTCT transmission 2016-2021 to give the country  
37 strategic guidance on validation of goals for elimination of mother to child transmission by 2021  
38 (14). To realize this dream, Kenya has to achieve more than 95% on each of the process indicators  
39 depicted on the PMTCT cascade (12). Previous studies conducted in sub-Saharan African  
40 countries including Kenya mainly investigate the possible determinants of vertical transmission of  
41 HIV infection among HIV positive mothers, only a few demonstrate the importance of the PMTCT  
42 cascade, including the indicators, and how missing one of the crucial steps of the cascade could  
43 increase the risk of HIV transmission from the mother to the infant (15). Kilifi, a predominantly  
44 rural county in the coastal region of Kenya has a HIV prevalence of 4.4%. It is one of the counties  
45 identified in the Kenya framework for elimination of mother to child transmission (2016-2021)  
46 due to the upward increase in MTCT rate from 7.7% (2015) to 8.3% (2018) (16); (14). During the

47 financial year 2018-2019, Kilifi County had a total of 62 HIV-exposed infants who were confirmed  
48 to be HIV infected despite many efforts geared to reverse the incidence of pediatric HIV. Due to  
49 this, the county has set up several innovative ways to improve key PMTCT indicators and despite  
50 laudable progress, the county's goal to eliminate HIV remains unaccomplished. The worrying  
51 numbers show a default in the PMTCT cascade by the HIV positive women.

52 This study, aimed to determine the risk factors associated with the outcomes of HIV exposed  
53 infants with the uptake of PMTCT indicators among the HIV-positive mothers based on the  
54 hypothesis that HIV exposed infants who become HIV infected are born to HIV positive women  
55 who default on the PMTCT cascade.

## 56 **Study goal**

57 To identify determinants of mother to child transmission among children born to HIV positive  
58 mothers on PMTCT Program in Kilifi County between July 2018 and June 2019

## 59 **Specific objectives**

- 60 1. To determine the association between ANC attendance of mothers and outcome of their  
61 HIV exposed children.
- 62 2. To determine the association between HIV testing of mothers at ANC and outcome of their  
63 HIV exposed children.
- 64 3. To determine the association between Maternal HAART and Infant prophylaxis and  
65 outcome of their HIV exposed children
- 66 4. To determine the association between skilled delivery of HIV positive mother and the  
67 status of her child.

68

69

## 70 Conceptual framework

71 **Figure 1:** Diagrammatic representation of the conceptual framework

72

73

74

75

76

77

78

79

80

81

82

83

84

85

86

87

88

89

90

91

92

93

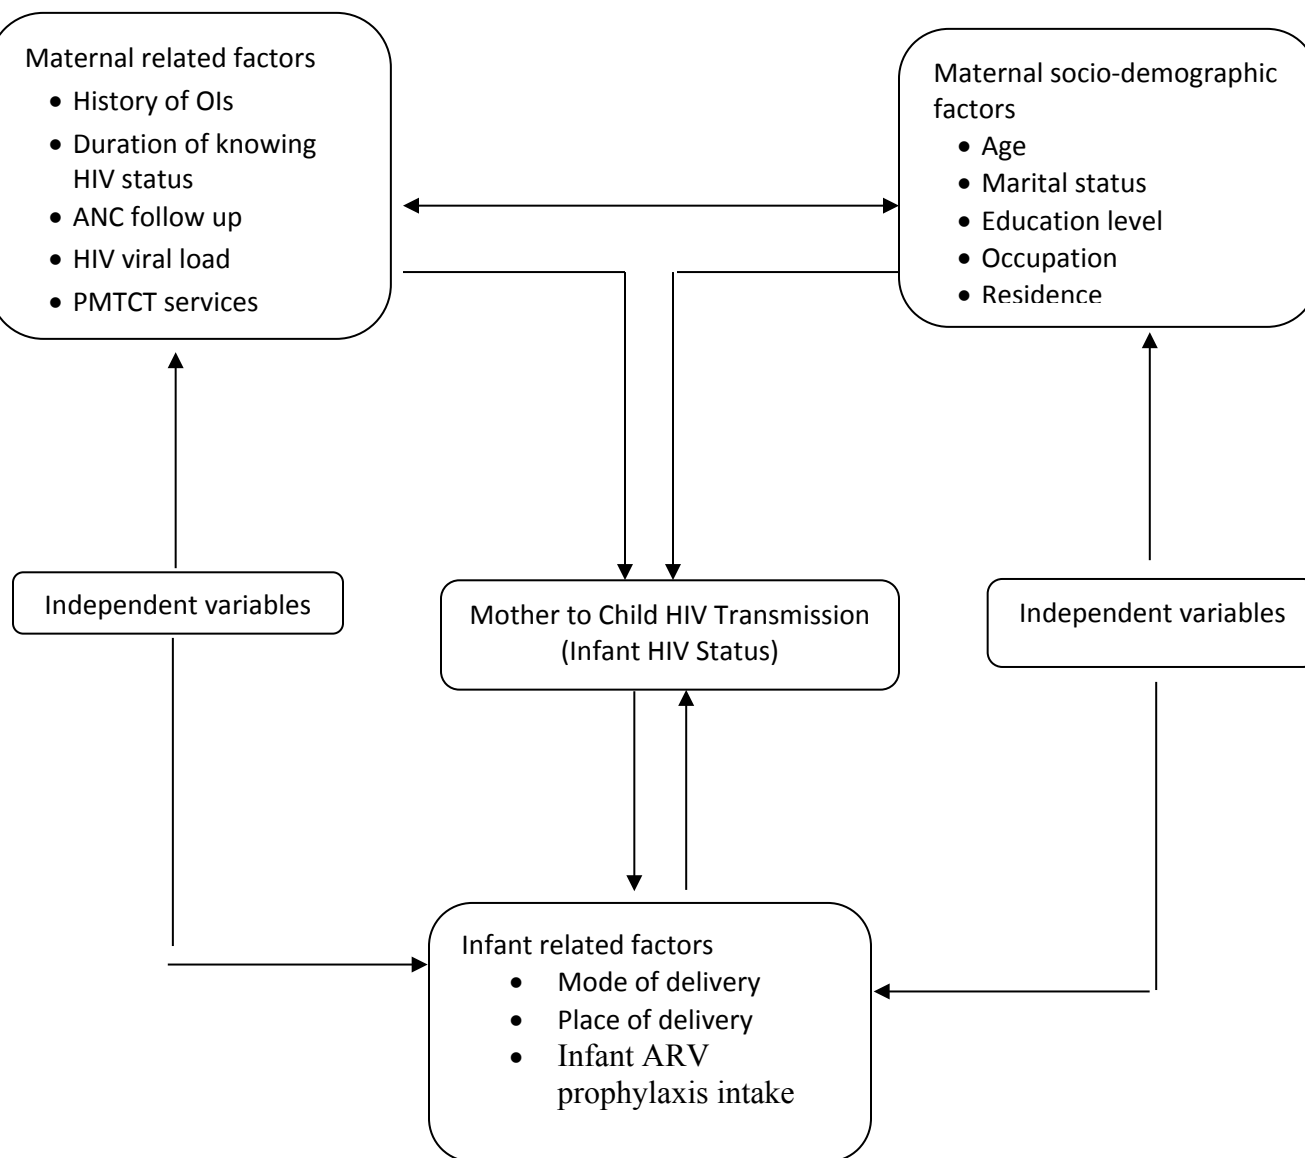

## 94 **Methodology**

### 95 **Study design and period**

96 This was a retrospective unmatched case control study, based on patient records. The study  
97 participants did not necessarily have the same characteristics, but were from the same population.

98 Selection of the study participants was based on HIV positive mothers who were enrolled in the  
99 PMTCT program and their index children. The mothers had a confirmatory HIV test done between  
100 July 2018 and June 2019 in Kilifi County.

101 A Case was defined as a HIV positive mother who was enrolled in the PMTCT program with her  
102 child who was tested and confirmed to be HIV infected between July 2018-June 2019 while a  
103 control was defined as a HIV positive mother who was enrolled in the PMTCT program with her  
104 child who was tested and confirmed to be HIV negative between July 2018-June 2019. The study  
105 period was between May 2020 to December 2021.

106 To control bias; the controls were randomly selected during the study period as the cases, hospital  
107 records were used and also during staistical analysis.

### 108 **Study site and population**

109 The study was carried out in Kilifi County which is located at the coastal region of Kenya. The  
110 county has a total population of 1,545,211 (17). It is divided into 7 sub-counties with a total of 143  
111 public health facilities and 151 private health facilities. Out of these, 173 offer PMTCT services  
112 to approximately 7% of the HIV infected female population. The study population included all  
113 HIV positive mothers whose HIV exposed child or children had a confirmatory HIV test result,  
114 positive for cases and negative for controls between July 2018-June 2019 in the different  
115 healthcare facilities.



## 116 **Variables**

### 117 **Dependent Variables**

118 Infant HIV status confirmed by DNA PCR testing (mother to child HIV transmission).

### 119 **Independent Variables**

120 ANC attendance of mother, Knowledge of HIV status of mother, Maternal HAART and Infant  
121 prophylaxis and place of delivery of mother.

### 122 **Inclusion criteria**

- 123• A HIV positive woman enrolled in the PMTCT program in Kilifi County
- 124• A HIV positive mother whose child had a confirmatory HIV test, positive for cases and negative  
125 for controls between July 2018 and June 2019.

### 126 **Sample size**

127 To determine the sample size, Epi Info Version 3.01 Stat calc function of sample size calculation  
128 for unmatched case-control study was used (18). At 95% confidence interval and 80% power  
129 estimates were derived from studies done on determinants of mother to child HIV transmission in  
130 Ethiopia (19). Least odds ratio of 1.80 assuming 32.4% and 74.9% of mothers in the cases and  
131 control group respectively exposed to PMTCT follow up at least four times. Considering a 1:2  
132 ratio of cases to controls, a sample size of 183 mother baby pairs (61 cases and 122 controls) was  
133 the calculated sample size.

134

135

## 136 Sampling technique

137 Stratified random sampling method was applied to select study subjects from the different county  
138 healthcare proportionately to their study population size. Cases and controls were selected by  
139 accessing the available digital/online medical registry. In reference to infant DNA HIV results,  
140 strata (the different healthcare facilities within the county) numbers were identified from the  
141 county population and by simple random sampling; cases and controls were selected  
142 proportionately (Fig. 2).

143 Fig. 2 Selection of cases and controls in Kilifi County

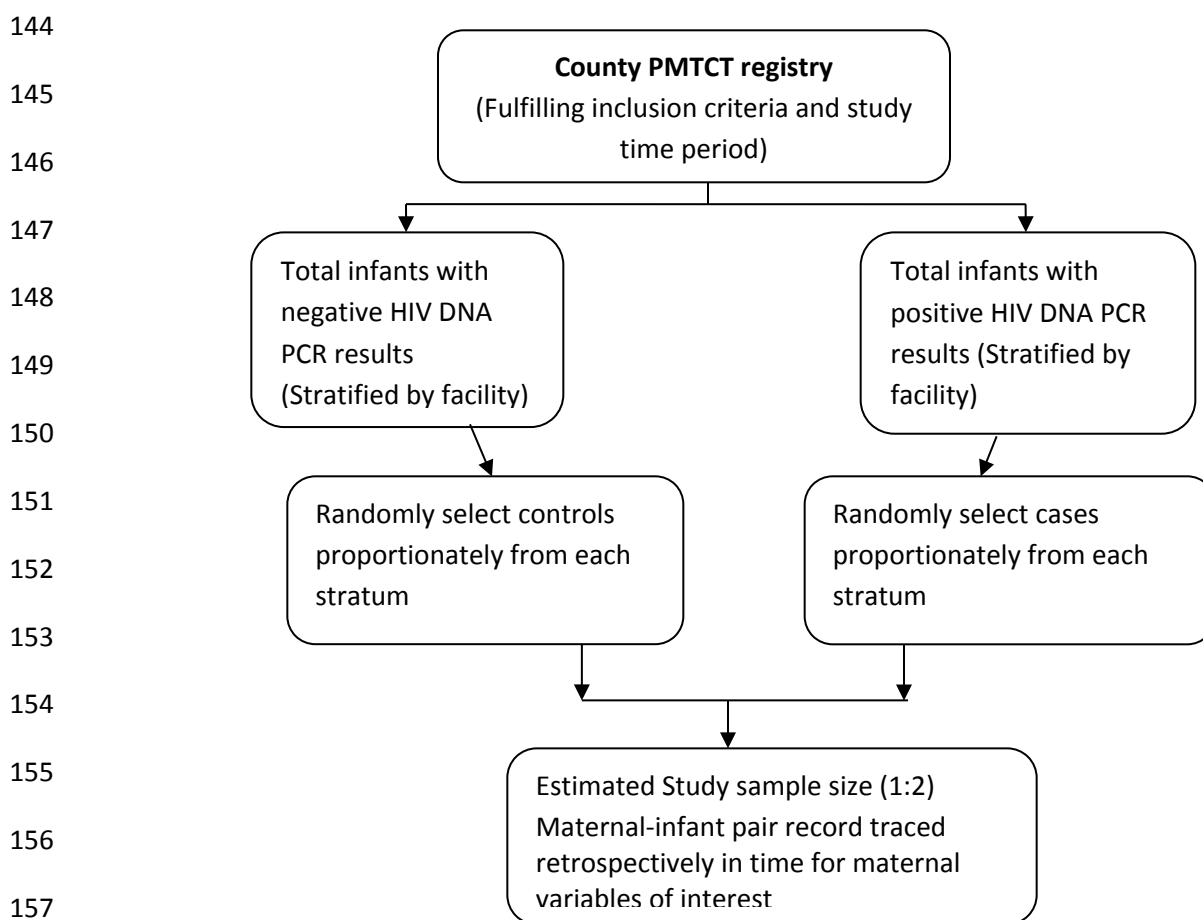

158

## 159 **Data collection**

160 To collect data, a researcher structured tool consisting of socio-demographic, infant and maternal  
161 characteristics was used. Data was extracted from ANC, Maternal and Postnatal registers. Data  
162 was collected by clinical nurses who had been trained and had at least 1 year experience in PMTCT  
163 service delivery at the selected facilities. The data was shared in MS Excel in a password controlled  
164 computer and backed up in a flash disk owned by the principal investigator.

165 Clients individual information including names, file and clinic number were excluded when the  
166 data collection tool was recorded. The authors did not have information that could identify  
167 individual participants during or after the study.

## 168 **Data management**

169 Data in MS Excel was cleaned and assessed for completeness and analysis done using MS Excel  
170 and IBM SPSS Statistics version 21. For categorical variables such as study categories (cases and  
171 controls) and gender, frequency and proportions was used. Chi-square test and logistic regression  
172 was done to assess any relationship between the dependent variable and categorical independent  
173 variables such as the breast infection, mixed feeding ANC visits. Odds ratio (OR) was used to  
174 estimate the strength of association between the exposure variables like ANC follow up, duration  
175 of knowing HIV status and mother to child HIV transmission. Data is presented in tables.

## 176 **Ethical consideration**

177 Ethical review of the proposal was done by KNH-UON Ethics and Research Committee. This was  
178 a retrospective study based on secondary data; therefore, a waiver for informed consent was  
179 requested. Once the study was approved (P374/07/2020); permission and approval to conduct the

180 study was also sought from the Kilifi County Health Management Team, Medical Superintendent  
181 and the Medical Records Officer in Charge, Kilifi County. Patient information including names,  
182 file and clinic number were excluded and the data collection tool recoded. In addition, the patient's  
183 medical records will be maintained in a safe lockable cabinet and destroyed after 5 years by  
184 burning to maintain confidentiality. Patients may not benefit directly from the study but the report  
185 will be shared with clinicians and relevant stakeholders to improve general patient care and  
186 management. The probable risk associated with the study includes loss of patient information,  
187 although the risk will be mitigated by use of trained healthcare workers and use of password  
188 controlled computers and lockable cabinets.

189

190

191

192

193

194

195

196

197

198

199

200

201

202

203 **Results**

204

205 **Demographic Characteristics**

206

207 **Gender and Age distribution**

208 The study sampled 161 infants enrolled in HIV Exposed Infant (HEI) program across various  
 209 health facilities within Kilifi County. Of these, 49% were male and 51% females. Across the infant  
 210 HIV test outcome categories, there were nearly same proportion of males as females though only  
 211 59 participants were sampled as Positive and 101 as negatives.

212 In terms of age in weeks at enrolment into the HEI program, 56% of the infants were between 4  
 213 and 24 weeks while 33% of the infants were less than a month old. Of all the HIV positive infants  
 214 58% were between 4 and 24 weeks of age while 17% were less than 4 weeks old. Of all the HIV  
 215 negative infants 55% were between 4 and 24 weeks old while 43% were less than a month old at  
 216 time of enrollment.

217 The table below summarizes the social demographic characteristics.

218 **Table 1: Summary of demographic characteristics of infants sampled**

| <b>Sex:</b> | <b><i>Infant HIV Test Outcome:</i></b> |     |                 |     | <b>Total</b>   |     |
|-------------|----------------------------------------|-----|-----------------|-----|----------------|-----|
|             | <b>Positive</b>                        |     | <b>Negative</b> |     | <b>(n=160)</b> |     |
|             | <b>(n=59)</b>                          |     | <b>(n=101)</b>  |     |                |     |
| Male        | 29                                     | 49% | 50              | 50% | 79             | 49% |
| Female      | 30                                     | 51% | 51              | 50% | 81             | 51% |

  

| <b>Age of infant at Enrolment into HEI Program (weeks)</b> | <b><i>Infant HIV Test Outcome:</i></b> |     |                 |     | <b>Total</b>   |     |
|------------------------------------------------------------|----------------------------------------|-----|-----------------|-----|----------------|-----|
|                                                            | <b>Positive</b>                        |     | <b>Negative</b> |     | <b>(n=161)</b> |     |
|                                                            | <b>(n=60)</b>                          |     | <b>(n=101)</b>  |     |                |     |
| <4                                                         | 10                                     | 17% | 43              | 43% | 53             | 33% |
| 4-24                                                       | 35                                     | 58% | 55              | 55% | 90             | 56% |
| 25-36                                                      | 8                                      | 13% | 1               | 1%  | 9              | 6%  |
| 37-72                                                      | 7                                      | 12% | 0               | 0%  | 7              | 4%  |

219

## 220 **Other Infant Variables**

221• Identification point of care

222• PCR test results

223• Infant prophylaxis regimen

224 In terms of identification, 81% of the infants were identified through MCH/PMTCT program, 7%  
225 were identified through OPD and the others were identified through CCC, Maternity and in  
226 Pediatrics ward. Among all the positive infants, 58% were identified through MCH/PMTCT and  
227 17% through OPD, 10% through pediatrics ward and 7% in CCC. Among those confirmed to be  
228 negative, 95% of them were identified through MCH/PMTCT services.

229 Majority (90%) of the infants enrolled received their PCR test results within the 1<sup>st</sup> 6 weeks or at  
230 first contact. Only 10% of the infants were not provided PCR test within the initial 6 weeks or at  
231 first contact overall. Among those who tested positive, 20% did not receive their PCR test in the  
232 initial 6 weeks or at first contact. This proportion stood at 4% for those confirmed to be negative

233 Out of all the infants enrolled only 4 did not receive infant prophylaxis and cotrimoxazole. Of  
234 those that had received infant prophylaxis, 88% had received both NVP and AZT while 12%  
235 received only NVP. 91% of the positive infants were on NVP and AZT while 9% were on NVP  
236 alone. 87% of the negative infants were on NVP and AZT while 13% were on NVP alone.

237

238

239

240 Table 2 below summarizes other infant variables

241 **Table 2: Other Infant Variables**

| Entry Point     | <i>Infant HIV Test Outcome:</i> |     |                    |     | Total<br>(n=157) |     |
|-----------------|---------------------------------|-----|--------------------|-----|------------------|-----|
|                 | Positive<br>(n=59)              |     | Negative<br>(n=98) |     |                  |     |
| CCC             | 4                               | 7%  | 3                  | 3%  | 7                | 4%  |
| Maternity       | 5                               | 8%  | 1                  | 1%  | 6                | 4%  |
| MCH/PMTCT       | 34                              | 58% | 93                 | 95% | 127              | 81% |
| OPD             | 10                              | 17% | 1                  | 1%  | 11               | 7%  |
| Pediatrics Ward | 6                               | 10% | 0                  | 0%  | 6                | 4%  |

  

| PCR Test Type:                | <i>Infant HIV Test Outcome:</i> |     |                    |     | Total<br>(n=158) |     |
|-------------------------------|---------------------------------|-----|--------------------|-----|------------------|-----|
|                               | Positive<br>(n=60)              |     | Negative<br>(n=98) |     |                  |     |
| Initial 6 weeks/First Contact | 48                              | 80% | 94                 | 96% | 142              | 90% |
| 2nd PCR (6 months)            | 4                               | 7%  | 3                  | 3%  | 7                | 4%  |
| 3rd PCR (12 months)           | 3                               | 5%  | 0                  | 0%  | 3                | 2%  |
| Other Time                    | 5                               | 8%  | 1                  | 1%  | 6                | 4%  |

  

| Infant prophylaxis Regimen | <i>Infant HIV Test Outcome:</i> |     |                  |     | Total<br>(n=161) |     |
|----------------------------|---------------------------------|-----|------------------|-----|------------------|-----|
|                            | Positive (n=55)                 |     | Negative (n=101) |     |                  |     |
| NVP                        | 5                               | 9%  | 13               | 13% | 18               | 12% |
| NVP & AZT                  | 50                              | 91% | 88               | 87% | 138              | 88% |

242

243 **Maternal Variables**

244• ANC attendance

245• Knowledge of HIV status

246• Maternal HAART

247• Disclosure of Maternal HIV Status

248• Place of delivery (Skilled delivery or home delivery)

249 Majority (88%) of mothers to all infants sampled in the study had attended ANC at least once. All

250 the mothers who had a HIV negative infant had attended ANC while 33% of those who had a HIV

251 positive infant did not attend ANC.

252 Most of the mothers (95%) of the infants sampled knew their HIV status prior to attending ANC.

253 This proportion was the same in both cases and control group.

254 On disclosure of HIV status, mothers to 86% of all the infants confirmed disclosing their HIV  
255 status. Among the HIV positive infants, 76% had disclosed while for the HIV negative infants,  
256 91% had disclosed.

257 Overall, most mothers (80%) had disclosed their status to their partners. More specifically, this  
258 was 88% among the mothers to 88% of the infants that were positive and mothers to 76% of the  
259 infants that were negative from the HEI outcomes.

260 Seventy-five (75%) of the mothers of all infants sampled received maternal HAART. Majority  
261 (62%) of the mothers whose infants tested positive for HIV did not receive maternal HAART while  
262 this proportion was only 3% among the mothers of HIV negative infants.

263 For the mothers that had started maternal HAART in ANC, 47% started at 1<sup>st</sup> trimester. Among  
264 positive, the proportion of those initiated on HAART within 1<sup>st</sup> trimester was 23% compared to  
265 53% of those in the negative arm started on HAART around the same reference period.

266 Of these deliveries, 82% of the mothers to all the sampled infants delivered at the health facility  
267 compared to 18% at home. Among the positive, home deliveries were 42% compared to 3% among  
268 negatives while hospital deliveries were 58% among the positive compared to 97% among  
269 negatives.

270 **Table 3: Summary of Maternal Variables**

| <b>Mother Attended ANC?</b> | <b><i>Infant HIV Test Outcome:</i></b> |                            | <b>Total<br/>(n=156)</b> |
|-----------------------------|----------------------------------------|----------------------------|--------------------------|
|                             | <b>Positive<br/>(n=57)</b>             | <b>Negative<br/>(n=99)</b> |                          |



|                                       |                        |     |                         |      |                |     |
|---------------------------------------|------------------------|-----|-------------------------|------|----------------|-----|
| Yes                                   | 38                     | 67% | 99                      | 100% | 137            | 88% |
| No                                    | 19                     | 33% | 0                       | 0%   | 19             | 12% |
| <b>HIV positive Status Known:</b>     |                        |     |                         |      | <b>Total</b>   |     |
|                                       | <b>Positive (n=59)</b> |     | <b>Negative (n=101)</b> |      | <b>(n=160)</b> |     |
| Yes                                   | 56                     | 95% | 96                      | 95%  | 152            | 95% |
| No                                    | 3                      | 5%  | 5                       | 5%   | 8              | 5%  |
| <b>Disclosed</b>                      |                        |     |                         |      | <b>Total</b>   |     |
|                                       | <b>Positive (n=59)</b> |     | <b>Negative (n=101)</b> |      | <b>(n=160)</b> |     |
| Yes                                   | 45                     | 76% | 92                      | 91%  | 137            | 86% |
| No                                    | 14                     | 24% | 9                       | 9%   | 23             | 14% |
| <b>Received Maternal HAART in ANC</b> |                        |     |                         |      | <b>Total</b>   |     |
|                                       | <b>Positive (n=60)</b> |     | <b>Negative (n=101)</b> |      | <b>(n=161)</b> |     |
| HAART                                 | 23                     | 38% | 98                      | 97%  | 121            | 75% |
| None                                  | 37                     | 62% | 3                       | 3%   | 40             | 25% |
| <b>When HAART was started</b>         |                        |     |                         |      | <b>Total</b>   |     |
|                                       | <b>Positive (n=23)</b> |     | <b>Negative (n=98)</b>  |      | <b>(n=121)</b> |     |
| 1st Trimester                         | 5                      | 23% | 52                      | 53%  | 57             | 47% |
| 2nd Trimester                         | 4                      | 17% | 17                      | 17%  | 21             | 17% |
| 3rd Trimester                         | 3                      | 13% | 4                       | 4%   | 7              | 6%  |
| Not Stated                            | 11                     | 47% | 25                      | 26%  | 36             | 30% |
| <b>Place of Delivery</b>              |                        |     |                         |      | <b>Total</b>   |     |
|                                       | <b>Positive (n=59)</b> |     | <b>Negative (n=100)</b> |      | <b>(n=159)</b> |     |
| Home                                  | 25                     | 42% | 3                       | 3%   | 28             | 18% |
| Hospital                              | 34                     | 58% | 97                      | 97%  | 131            | 82% |
| <b>Infant prophylaxis Regimen</b>     |                        |     |                         |      | <b>Total</b>   |     |
|                                       | <b>Positive (n=55)</b> |     | <b>Negative (n=101)</b> |      | <b>(n=161)</b> |     |
| NVP                                   | 5                      | 9%  | 13                      | 13%  | 18             | 12% |
| NVP & AZT                             | 50                     | 91% | 88                      | 87%  | 138            | 88% |

271

272

## 273 Bivariate and Multivariate Analysis

274 The study established a significant relationship between the HIV status of the HIV exposed infant  
 275 and the ANC attendance of the mother ( $p=0.00$ ) and the mother receiving HAART in ANC  
 276 ( $p=0.00$ ) using the chi-square test at a 5% level of significance. Only receipt of maternal HAART  
 277 in ANC was established as the major determinant of a favorable HEI outcome in this study. On

278 the nature of the relationships between the outcome of the HEI and the independent factors,  
 279 disclosure of HIV status by the mother at ANC was 3.18 (1.28 - 7.90) times more likely to  
 280 determine a favorable outcome of the HEI compared to non-disclosure at a 5% level of significance  
 281 when taken independently. When adjusted for other factors, it was 6.27 (1.20 - 20.05) times more  
 282 likely to determine a favorable outcome of the HEI at 1% level of significance. On maternal  
 283 HAART at ANC, infants whose mothers had received maternal HAART in ANC were 52.55  
 284 (14.89 - 185.48) times more likely to be HIV negative compared to those whose mothers did not  
 285 receive maternal HAART in ANC at 1% level of significance and taken independently of other  
 286 factors. This came down to 30.23 (7.56 - 120.96) times when adjusted for other factors at the same  
 287 level of significance.

288 **Table 4: Summary of Bivariate and Multivariate analysis**

| Variable<br>s:                               | <i>Infant HIV Test<br/>Outcome:</i> |          |        |          | Total | P-<br>value | COR (95% CI)                 | AOR (95% CI)                |
|----------------------------------------------|-------------------------------------|----------|--------|----------|-------|-------------|------------------------------|-----------------------------|
|                                              | Positive                            | Negative |        |          |       |             |                              |                             |
| <b><i>Mother Attended ANC?</i></b>           |                                     |          |        |          |       |             |                              |                             |
| Yes                                          | 3<br>8                              | 67<br>%  | 9<br>% | 100<br>% | 137   | -           | -                            | -                           |
| No                                           | 1<br>9                              | 33<br>%  | 0<br>% | 0%       | 19    | -           | -                            | -                           |
| <b><i>HIV positive Status Known:</i></b>     |                                     |          |        |          |       |             |                              |                             |
| Yes                                          | 5<br>6                              | 95<br>%  | 9<br>% | 95%      | 152   | .970        | 1.03 (0.24 - 4.47)           | 0.74 (0.98 - 5.64)          |
| No                                           | 3                                   | 5%       | 5      | 5%       | 8     |             |                              |                             |
| <b><i>Disclosed</i></b>                      |                                     |          |        |          |       |             |                              |                             |
| Yes                                          | 4<br>5                              | 76<br>%  | 9<br>% | 91%      | 137   | .010        | 3.18 (1.28 - 7.90) *         | 6.27 (1.20 - 20.05)<br>**   |
| No                                           | 1<br>4                              | 24<br>%  | 9<br>% | 9%       | 23    |             |                              |                             |
| <b><i>Received Maternal HAART in ANC</i></b> |                                     |          |        |          |       |             |                              |                             |
| HAART                                        | 2<br>3                              | 38<br>%  | 9<br>% | 97%      | 121   | .000        | 52.55 (14.89 -<br>185.48) ** | 30.23 (7.56 -<br>120.96) ** |
| None                                         | 3<br>7                              | 62<br>%  | 3<br>% | 3%       | 40    |             |                              |                             |

---

| <i>Mode of Delivery</i> |   |    |   |     |     |      |                    |                    |
|-------------------------|---|----|---|-----|-----|------|--------------------|--------------------|
| SVD                     | 5 | 97 | 9 | 96% | 155 |      | 0.84 (0.15 - 4.71) | 0.53 (0.03 - 9.65) |
|                         | 8 | %  | 7 |     |     | .839 |                    |                    |
| CS                      | 2 | 3% | 4 | 4%  | 6   |      |                    |                    |

---

289

290

291

292

293

294

295

296

297

298

299

300

301

302

303

304

305

306

307

308

## 309 **Discussion**

310 ANC services provides an opportunity for key interventions in prevention of vertical transmission  
311 of HIV. Such interventions include early diagnosis of the HIV positive pregnant woman, prompt  
312 initiation of HAART, Viral load monitoring and Enhanced Adherence Counselling when  
313 necessary, psychosocial support and health education on importance of skilled delivery. All these  
314 interventions contribute towards a HIV negative infant.

315 The current National ANC attendance is at 74%, there is need to improve this to 95% as ANC  
316 provides an opportunity for HIV testing and initiation of HAART for the HIV positive mother.  
317 Importance of improving this indicator is evidenced by Kenya National Bureau of  
318 Statistics/Government of Kenya, 2015 which showed that only 19% of Kenyan women visit the  
319 ANC within the first 4 months of pregnancy and 31% make their initial visits at 4-5months and  
320 6-7 months respectively and only 68% visit the clinic at least 4 times.

321 On attendance of antenatal care clinics, the study found that all mothers who had HIV negative  
322 infant had attended ANC at least once while for the mothers who had a HIV infected infant only  
323 67% had attended at least 1 ANC visit. This finding demonstrates the importance of Antenatal care  
324 clinics and is consistent with literature on access to ANC services and reduction of mother to child  
325 transmission rate. In a study done by *Gunn et al* on Antenatal care and uptake of HIV testing  
326 among pregnant women in Sub Saharan Africa, it was established that women who had access to  
327 ANC services accessed HIV testing services which is the entry point in PMTCT care cascade (6).  
328 In another study done in Brazil, it showed that lack of antenatal care and late diagnosis underlie  
329 substantial gaps in PMTCT cascade (20) No studies were found that do not agree with importance  
330 of ANC in prevention of vertical transmission of HIV.

331 Our study evaluated the relationship between knowledge of the mother's HIV status and outcome  
332 of their infants. The study sought to find out whether women who know their HIV positive status  
333 early in pregnancy had lower risk of having a HIV positive infant on the basis that interventions  
334 of PMTCT would be started early. Identification coverage of HIV positive women in reproductive  
335 age is important in reducing MTCT of HIV. Women who know their HIV status are more likely  
336 to have started HAART and are more likely to have achieved viral load suppression at the time of  
337 conception, during pregnancy and breastfeeding. Planned pregnancies among the HIV positive  
338 women decreases the odds of a mother transmitting HIV virus to her baby. The study did not show  
339 any difference in knowledge of HIV status of the mother and outcome of their children as 95% of  
340 women in both the control and cases group knew of their status before ANC. This finding was  
341 similar to a study done in Western Kenya which aimed at describing the mother baby pairs  
342 enrolling in PMTCT program. It showed that 68% of Known Positive women enrolled in PMTCT  
343 were not on ART at time of conception despite their knowledge of their HIV status. For those on  
344 HAART, a significant number (14%) had an unsuppressed viral load. All which suggested that  
345 knowledge of HIV status alone may not contribute to prevention of mother to child transmission  
346 (21) This finding was however contrary to a study done in South Africa that showed that women  
347 aware of their HIV status before the index pregnancy were more likely to receive PMTCT and to  
348 test their infants early hence have a HIV negative infant. (22) Several case control studies looking  
349 at determinants of mother to child transmission showed a positive correlation between women who  
350 did not know their status and mother to child transmission of HIV infection (23) (20)

351 Disclosure of one's HIV status improves uptake and retention in prevention of mother to child  
352 transmission of HIV services. Disclosure of HIV status allows the mother to have psychosocial  
353 support this in turns leads to increased adherence to PMTCT services. Our study evaluated whether

354 disclosure of the mother's HIV positive status had any relationship to the outcome of the HIV  
355 status of the infant. On disclosure of HIV status, mothers to 86% of all the infants confirmed  
356 disclosing their HIV status. Among the HIV positive infants, 76% had disclosed while for the HIV  
357 negative infants, 91% had disclosed their status. This finding is consistent with a study done in  
358 Kenya that assessed HIV positive status disclosure and use of essential PMTCT and Maternal  
359 Health services. It established that women living with HIV who had not disclosed to anyone had  
360 the lowest levels of PMTCT service utilization (24) In another study done in Kenya looking at the  
361 prevalence and correlates of non-disclosure of maternal HIV status to male partners; it established  
362 that non-disclosure was associated with lower use of PMTCT services and facilitating maternal  
363 disclosure to male partners may enhance PMTCT uptake (25).

364 Prompt HAART initiation is associated with rapid Viral load suppression consequently reduction  
365 in vertical transmission of HIV. Our study evaluated the relationship between uptake of maternal  
366 HAART among the mothers and HIV status outcome of their infants. It also looked at the  
367 relationship between uptake of infant prophylaxis among HIV exposed infants and their HIV  
368 status. The study found that 75% of all the mothers were on HAART while 25% of them were not  
369 on HAART. On relationship between maternal HAART and HIV status of the HIV exposed infant  
370 it was established that 97% of the mothers of the infants in the control group were on HAART  
371 while only 38% of the mothers of the infants in the cases group were on HAART. 62% of the  
372 infants who became HIV infected were born of mothers who were not on HAART. Several studies  
373 have shown the importance of maternal HAART in prevention of vertical transmission. As lack of  
374 Maternal HAART leads to maternal HIV viremia which increases the odds of vertical transmission  
375 (21). In another study done in Nigeria looking at the impact of Maternal HAART in its prevention

376 of vertical transmission of HIV showed that, none of the exposed children born to HIV positive  
377 mothers on HAART were vertically infected with HIV-1 and HIV-2 (26).

378 Early initiation of maternal HAART by HIV positive pregnant women has been shown to reduce  
379 viral load of HIV to undetectable levels and hence reduce vertical transmission of HIV. Our study  
380 also agreed with this as 53% of the infants who confirmed to be HIV negative were born of mothers  
381 who were initiated on HAART during 1<sup>st</sup> trimester compared to the 23% of HIV positive infants  
382 whose mothers initiated HAART in 1<sup>st</sup> trimester.

383 On adherence to maternal HAART, 71% of the mothers were rated to have good adherence while  
384 16% were rated poor. 94% of the infants who tested and confirmed to be negative were born of  
385 mothers who were rated to have good adherence. A study done in neighboring Ethiopia established  
386 that poor adherence to maternal HAART was associated with an increased risk of vertical  
387 transmission of HIV(23)

388 Skilled delivery is defined as delivery conducted by trained healthcare personnel. Labor and  
389 delivery poses the greatest transmission risk of HIV with 10-20% exposed infants being infected  
390 during this time. The study evaluated the relationship between skilled delivery and outcome of  
391 the HIV exposed infant. The study established 82% of the mothers delivered at the health facility  
392 compared to 18% at home. Among the positive, home deliveries were 42% compared to 3% among  
393 negatives while hospital deliveries were 58% among the positive compared to 97% among  
394 negatives. Similar studies done established the importance of skilled delivery in prevention of  
395 mother to child transmission of HIV (21) (23) (27).

396

## 397 **Conclusion**

398 Similar to literature reviewed from other countries this study established the importance of  
399 PMTCT service delivery in reduction of vertical transmission of HIV. ANC attendance, early  
400 diagnosis of maternal HIV, prompt initiation and adherence to HAART, skilled delivery of the  
401 HIV positive pregnant woman were all associated with reduction of mother to child transmission  
402 rate. Based on the findings it was established that women who defaulted on the PMTCT cascade  
403 services had higher odds of having a HIV positive infant compared to women who accessed all the  
404 PMTCT services at the recommended time. This agreed with a study by *Hamilton et al* PMTCT  
405 cascade analysis which showed that new HIV infections among children were seen among women  
406 who did not complete their cascade (28).

407 Other variables that showed association were male partner involvement and involvement of the  
408 mother in psychosocial support groups. These findings are similar to studies which looked at such  
409 determinants (23) (20) (21) (28).

## 410 **Recommendation**

411 There is need to emphasize the importance of attending ANC clinic for all pregnant women.

412 There is need to emphasize the importance of all the steps of the PMTCT Cascade to HIV positive  
413 mothers attending ANC.

414 There is need to ensure that all women who test positive for HIV are started on HAART and  
415 followed up for adherence.

## 416 **What is already known about this topic**



- 417       • Vertical transmission of HIV can be eliminated and ANC services provides an opportunity  
418       for key interventions in prevention of vertical transmission of HIV.
- 419       • Women who know their HIV status are more likely to have started HAART and are more  
420       likely to have achieved viral load suppression at the time of conception, during pregnancy  
421       and breastfeeding. Planned pregnancies among the HIV positive women decreases the odds  
422       of a mother transmitting HIV virus to her baby.
- 423       • Prompt HAART initiation is associated with rapid Viral load suppression consequently  
424       reduction in vertical transmission of HIV.

425

#### 426 **What this study adds**

- 427       • The findings from this study provide an insight on the importance antenatal clinic  
428       attendance in diagnosis of HIV and on initiation of HAART among pregnant women thus  
429       preventing vertical transmission of HIV
- 430       • The findings from this study highlights missed opportunities and its consequences in  
431       Prevention of Mother to Child transmission of HIV.

#### 432 **Competing Interests**

433       The authors declare no competing interests.

434

435

436

437

## 438 **Acknowledgements**

439 We deeply appreciate Fauz Ibrahim and his team for their assistance in data collection and their  
440 commitment in this study.

441

## 442 **Funding**

443 The authors did not receive any specific funding for this study

444

445

446

447

448

449

450

451

452

453

454

455

456

457

## 458 **References**

- 459 1. WHO. Communities make the difference. World Heal Organ. 2019;1(12):1–2.
- 460 2. UNAIDS. Global HIV and AIDS statistics. Jt United Nations Program HIV/AIDS-Avert.  
461 2019;1(1):1–6.
- 462 3. WHO. Prevention of mother-to-child transmission ( PMTCT ) of HIV. World Heal Organ.  
463 2018;1–25.
- 464 4. UNAIDS. Children, HIV and AIDS. Jt United Nations Program HIV/AIDS-Avert.  
465 2017;5(4):1–18.
- 466 5. UNAIDS. HIV and AIDS in Kenya. Jt United Nations Program HIV/AIDS-Avert.  
467 2018;1(1):1–15.
- 468 6. Gunn JKL, Asaolu IO, Gibson SJ, Wightman P, Ezeanolue EE, Ehiri JE. Antenatal care and  
469 uptake of HIV testing among pregnant women in sub-Saharan Africa : a cross-sectional  
470 study. 2016;
- 471 7. Tsehay AK. Risk of HIV and associated factors among infants born to HIV-positive women  
472 in northwest Ethiopia. Ethiop J Heal Dev. 2019;33(1):1–6.
- 473 8. Goga A, Singh Y, Jackson D, Pillay Y, Chirinda W, Hayashi C, et al. Is elimination of  
474 vertical transmission of HIV in high prevalence settings achievable? Br Med J.  
475 2019;10(1136):364–1687.
- 476 9. WHO. Global guidance on criteria and processes fro validation: Mother to child  
477 transmission of HIV and Syphilis. World Heal Organ. 2017;1–52.
- 478 10. Alachew Y, Ejigu T, Mulugeta Y, Ashagrea M. Determinants of Mother to Child  
479 Transmission of HIV Among Infants Born from HIV Positive Women in North Wollo Zone,

- 480 North East Ethiopia: 2018, Case Control Study. *J AIDS HIV Infect.* 2019;5(1):1–13.
- 481 11. NASCOP. Kenya HIV Estimates Report 2018. 2018.
- 482 12. NASCOP. Kenya HIV Estimates Report 2018. *Natl AIDS Control Counc.* 2018;1–34.
- 483 13. Waruru A, Achia TNO, Muttai H, Ng’ang’a L, Zielinski-Gutierrez E, Ochanda B, et al.  
484 Spatial-temporal trend for mother-to-child transmission of HIV up to infancy and during  
485 pre-Option B+ in western Kenya, 2007-13. *PeerJ.* 2018;6(3).
- 486 14. NASCOP. Kenya Framework for Elimination of Mother-To-Child Transmission of HIV  
487 and Syphilis 2016-2021. *Natl AIDS STI Control Program.* 2019;1–68.
- 488 15. Dionne-Odom J, Welty TK, Westfall AO, Chi BH, Ekouevi DK, Kasaro M, et al. Factors  
489 associated with PMTCT cascade completion in four african countries. *AIDS Res Treat.*  
490 2016;2016(December).
- 491 16. National AIDS Control Council. Kilifi County HIV/AIDS Strategic plan (2016-2020). *Natl*  
492 *AIDS Control Counc.* 2020;1–80.
- 493 17. KNBS. Population by County and Sub-County. *Kenya Popul Hous Census.* 2019;1(11):1–  
494 49.
- 495 18. Sullivan KM, Soe MM. Sample Size for an Unmatched Case-Control Study. *Open Source*  
496 *Stat Public Heal.* 2012;1(1):2–3.
- 497 19. Burusie A, Deyessa N. Determinants of Mother to Child HIV Transmission (HIV MTCT):  
498 A Case Control Study in Assela, Adama and Bishoftu Hospitals, Oromia Regional State,  
499 Ethiopia. *Cell Dev Biol.* 2015;4(2):1–12.
- 500 20. Lovero KL, de Oliveira TRD, Cosme EM, Cabrera NB, Guimarães MF, de Avelar JG, et  
501 al. Retrospective analysis of risk factors and gaps in prevention strategies for mother-to-  
502 child HIV transmission in Rio de Janeiro, Brazil. *BMC Public Health.* 2018;18(1):1110.

- 503 21. Ogalo EA, Adina JO, Ooko H, Batuka J, Kimaiyo S. Mother–baby dyads enrolled in  
504 PMTCT care in western Kenya: characteristics and implications for ART programmes.  
505 African J AIDS Res. 2018;17(3):241–7.
- 506 22. Jonathan Posner and Bradley S. Peterson JAR. 基因的改变 NIH Public Access. Bone.  
507 2008;23(1):1–7.
- 508 23. Beyene GA, Dadi LS, Mogas SB. Determinants of HIV infection among children born to  
509 mothers on prevention of mother to child transmission program of HIV in Addis Ababa,  
510 Ethiopia: A case control study. BMC Infect Dis. 2018;18(1):1–10.
- 511 24. Spangler SA, Onono M, Bukusi EA, Cohen CR, Turan JM. HIV-positive status disclosure  
512 and use of essential PMTCT and maternal health services in rural Kenya. J Acquir Immune  
513 Defic Syndr. 2014;67:S235–42.
- 514 25. Kinuthia J, Singa B, McGrath CJ, Odeny B, Langat A, Katana A, et al. Prevalence and  
515 correlates of non-disclosure of maternal HIV status to male partners: A national survey in  
516 Kenya. BMC Public Health. 2018;18(1):1–10.
- 517 26. Ewenighi-Amankwah CO, Onyenekwe CC, Udemba O, Muogbo P, Rong L. A Mother-to-  
518 Child Transmission Study in Nigeria: The Impact of Maternal HIV Infection and HAART  
519 on Plasma Immunoglobulins, Cytokine Profiles and Infant Outcome. Virol Sin.  
520 2020;35(4):468–77.
- 521 27. Azcoaga-Lorenzo A, Ferreyra C, Alvarez A, Palma PP, Velilla E, Del Amo J. Effectiveness  
522 of a PMTCT programme in rural Western Kenya. AIDS Care - Psychol Socio-Medical Asp  
523 AIDS/HIV. 2011;23(3):274–80.
- 524 28. Hamilton E, Bossiky B, Ditekemena J, Esiru G, Gyn MO, Srhr D, et al. Using the PMTCT  
525 Cascade to Accelerate Achievement of the Global Plan Goals. 2017;75:27–35.

526

527

528

529
